# Supplementary material
Source: PubMed Central journal article supplement (PMC9627543)
Supplement: NIHMS1841147-supplement-Appendix_1.pdf [file NIHMS1841147-supplement-Appendix_1.pdf]

## Appendix 1. Preexposure Prophylaxis Interview Guide

### Assessing attitudes, beliefs, and interest for pre-exposure prophylaxis (PrEP) in pregnancy and in the postpartum period

In this first section, I'd like to ask about medication use in general.

1. Can you tell me about your experiences with prenatal vitamins in pregnancy?
  - a. **If yes:** how do you feel about taking daily vitamins during pregnancy?
  - b. Tell me about any challenges you have had taking prenatal vitamins during pregnancy if any. Why do you think you had these challenges? What might have helped you to overcome these challenges?
  
2. Please tell me about any medications in pregnancy?
  - a. **If yes,** tell me which medication you take,
    - i. how you decided to take it,
    - ii. who helped you with this decision, if anyone?
    - iii. Also, in your own words, how do you feel about taking medication during pregnancy.
    - iv. Tell me in your own words about any challenges you have had taking medication during pregnancy.
      1. why do you think you struggled to take X medication? What might have helped you overcome these struggles?
  
3. Tell me about any conversations you have had with your provider about taking medication during pregnancy.
  - a. **If have had:**
    - i. who started the conversation? How did you feel about the conversation? How do you feel about the way they communicate with you (likes/dislikes)? Are there any ways that the communication could be more helpful to you?

Now I'd like to ask you about your own perceived HIV risk and also about PrEP medication.

4. Day to day, how vulnerable to you think you are to HIV infection?
  - a. **Yes:** can you tell me a little bit about what puts you at risk?
  - b. **No:** Can you tell me a little bit about what keeps you safe?
    - i. Okay so right now you don't feel vulnerable to HIV but can you tell me if at any time you felt vulnerable or at risk?
    - ii. What do you think makes someone at risk for HIV?

Groves AK, Vadaketh J, Raziano VT, Nkwihoreze H, Short W, Momplaisir F. Preexposure prophylaxis acceptability among pregnant women and implications for human immunodeficiency virus prevention in clinical practice. *Obstet Gynecol* 2022;139.

The authors provided this information as a supplement to their article.

©2022 American College of Obstetricians and Gynecologists.

Page 1 of 4

iii. Where did you learn about HIV?

Okay so now we are going to move into talking about HIV and sexually transmitted infections.

5. So can you tell me about your experiences with HIV testing during your pregnancy?
  - a. Okay what about the conversations your doctor had with you when you got HIV tested
6. Now we are going to talk about sexually transmitted infections. So can you tell me about your experiences with STI infections and getting tested during your pregnancy?
  - a. Okay and what conversations did your doctor have about this with you
  - b. Okay so if you don't mind me asking if any of them came back positive did they talk to you about treatment or anything else with the STD
  - c. So they treat the infection do they tell you anything else about the STD
7. Tell me in your own words what you have heard, if anything, about PrEP medication.
  - a. **If yes** : what have you heard? where did you learn this information? How much do you believe what you have heard?
  - b. **If no, probe**: No problem, PrEP is still very new and many people have yet to hear about it.
  - c. Where would you have preferred to hear about prep

Now I am going to tell you a little more about Prep. Oral Pre-Exposure prophylaxis, also called PrEP, is used for those at risk for HIV as a way to prevent infection with HIV. Other common names for PrEP that you may have heard of are Truvada and Descovy. This medication requires that patients take the oral pill everyday and return to a provider every 3 months for various labs to be completed. According to the CDC, PrEP reduces the risk of getting HIV from sex by about 99% when taken daily, and among people who inject drugs, reduces the risk of getting HIV by at least 74% when taken daily. The FDA has approved PrEP for pregnant women since it has been proven to be safe and effective during pregnancy. I am conducting interviews to gather pregnant women's perspectives on PrEP in Philadelphia.

8. What questions do you have about the information I just told you?
9. What do you think about using PrEP in general?
  - a. Probes: Tell me anything you think about it that is bad?
  - b. What about anything you think about it that is good?

Groves AK, Vadaketh J, Raziano VT, Nkwihoreze H, Short W, Momplaisir F. Preexposure prophylaxis acceptability among pregnant women and implications for human immunodeficiency virus prevention in clinical practice. *Obstet Gynecol* 2022;139.

The authors provided this information as a supplement to their article.

©2022 American College of Obstetricians and Gynecologists.

10. What do you think about using PrEP in pregnancy?
- Probes: is there anything you think about it that is bad? (e.g., side effects)
  - Is there anything you think about it that is good for you?
  - Is there anything that might good for your baby?
  - When you discuss decisions about your pregnancy who do you discuss these decisions with? Would you feel comfortable discussing PREP with them?
11. Based off of the information on oral PrEP provided above, and if this was available at no cost to you, how would you feel about using oral PrEP during pregnancy?
- Probes: can you tell me what made you answer in this way? Is there anything that might change your mind?
  - So you said you wouldn't feel comfortable taking Prep but if you had a family member pregnant and at risk for HIV would you recommend prep to them? Why or why not?

10. How comfortable would you feel asking your OBGYN to prescribe oral PrEP?
- Probes: can you tell me what made you answer in this way? "Why do you feel like this"

11. You mentioned earlier in our conservations that you (did/did not) have challenges taking vitamins/medication in pregnancy. How do you think taking a daily PrEP pill might be similar or different for you?

For those who say they would consider PrEP:

Now I am going to tell you a little bit more about the injectable prep. Long-Acting Injectable PrEP is currently about to be approved which is another way to prevent HIV. This medication does not involve a daily pill, but an injection in the butt muscle every 4 to 8 weeks along with lab work. It is called "long acting" because the effect of the medication lasts for 4 to 8 weeks instead of 24 hours as is the case for oral PrEP. Injectable PrEP is safe and has not currently been approved for pregnant women, however if you are on oral PrEP there are no problems in transitioning to injectable PrEP for after your delivery.

12. How do you feel about transitioning from oral PrEP to injectable PrEP after your pregnancy be of interest to you? Why or Why not?

Groves AK, Vadaketh J, Raziano VT, Nkwihoreze H, Short W, Momplaisir F. Preexposure prophylaxis acceptability among pregnant women and implications for human immunodeficiency virus prevention in clinical practice. *Obstet Gynecol* 2022;139.

The authors provided this information as a supplement to their article.

©2022 American College of Obstetricians and Gynecologists.

- a. What do you think are the benefits of transitioning to injectable PrEP after your pregnancy?
- b. What do you think are the possible drawbacks (if any) to transitioning to injectable PrEP after pregnancy?

13. **(don't ask if say no to injectable)** If you were to start injectable PrEP after you have your baby, which way of getting the injectable would be more acceptable to you and your lifestyle: going to the clinic every month or every 2 months for the injection, having someone come to your home to get the injection or going to a pharmacy near you to get the injection?

- a. Tell me why the option you chose is the best one for you and why the others are less acceptable to you.

11. What are your current plans for breastfeeding your baby?

Probe: **If yes:** tell me why you are hoping/planning to breastfed. How might you feel about taking medication while breastfeeding?

If no: (no follow up questions)

Last: ask the participants if there is anything else they would like to share or questions they have.

Groves AK, Vadaketh J, Raziano VT, Nkwihoreze H, Short W, Momplaisir F. Preexposure prophylaxis acceptability among pregnant women and implications for human immunodeficiency virus prevention in clinical practice. *Obstet Gynecol* 2022;139.

The authors provided this information as a supplement to their article.

©2022 American College of Obstetricians and Gynecologists.

Page 4 of 4
